# Supplementary material
Source: PubMed Central journal article supplement (PMC11028391)
Supplement: 262_2019_2427_MOESM1_ESM.pdf [file 262_2019_2427_MOESM1_ESM.pdf]

# Supplementary table 1:

## Relative distribution of PD-1/PD-L1 positive immune cells

| HCC patient | PD-1 positive Immune Cells |                     |                                  | PD-L1 positive Immune Cells |                     |                                  |
|-------------|----------------------------|---------------------|----------------------------------|-----------------------------|---------------------|----------------------------------|
|             | Percent total cells        | Percent Macrophages | Percent CD8 <sup>+</sup> T cells | Percent total cells         | Percent Macrophages | Percent CD8 <sup>+</sup> T cells |
| #3          | 0.5                        | all                 | none                             | negative                    | none                | none                             |
| #7          | negative                   | none                | none                             | 1                           | all                 | none                             |
| #13         | 20                         | 16                  | 4                                | 0.5                         | all                 | none                             |
| #16         | 10                         | 1                   | 8                                | 1                           | all                 | none                             |
| #19         | negative                   | none                | none                             | 0.6                         | 0.3                 | 0.3                              |
| #20         | 10                         | 9.5                 | 0.5                              | 3                           | all                 | none                             |
| #22         | 0.5                        | all                 | none                             | negative                    | none                | none                             |
| #29         | negative                   | none                | none                             | 10                          | 9.5                 | 0.5                              |
| #33         | negative                   | none                | none                             | 1                           | 0.8                 | 0.2                              |
| #42         | negative                   | none                | none                             | 1                           | all                 | none                             |
| #46         | 10                         | 0.5                 | 9.5                              | negative                    | none                | none                             |

# Supplementary table 2:

## Checkpoint molecules on T cell subsets

|                                                                  | Healthy controls        | Disease Controls<br>without HCC | HCC         |
|------------------------------------------------------------------|-------------------------|---------------------------------|-------------|
| <b>a) T effector cells</b>                                       |                         |                                 |             |
| Percent CD4 <sup>+</sup> T cells (mean ± SD)                     | 51.7 ± 6.9              | 49.9 ± 12.0                     | 51.2 ± 11.6 |
| Percent CD8 <sup>+</sup> T cells (mean ± SD)                     | 26.9 ± 6.6              | 26.2 ± 9.3                      | 25.7 ± 10.9 |
| Percent CTLA-4 <sup>+</sup> CD4 <sup>+</sup> T cells (mean ± SD) | 5.0 ± 1.2               | 5.8 ± 2.0                       | 5.8 ± 1.3   |
| Percent CTLA-4 <sup>+</sup> CD8 <sup>+</sup> T cells (mean ± SD) | 3.8 ± 1.4               | 4.9 ± 2.2                       | 4.2 ± 1.4   |
| Percent GITR <sup>+</sup> CD4 <sup>+</sup> T cells (mean ± SD)   | 4.3 ± 1.2               | 5.0 ± 1.6                       | 4.3 ± 1.3   |
| Percent GITR <sup>+</sup> CD8 <sup>+</sup> T cells (mean ± SD)   | 4.4 ± 1.4               | 5.1 ± 2.2                       | 4.3 ± 1.7   |
| Percent Tim3 <sup>+</sup> CD4 <sup>+</sup> T cells (mean ± SD)   | 4.6 ± 1.7               | 4.8 ± 1.8                       | 4.5 ± 2.0   |
| Percent Tim3 <sup>+</sup> CD8 <sup>+</sup> T cells (mean ± SD)   | 4.6 ± 1.9               | 6.1 ± 3.5                       | 4.8 ± 2.1   |
| <b>b) Regulatory T cells</b>                                     |                         |                                 |             |
| Percent CTLA-4 <sup>+</sup> cells among Tregs (mean ± SD)        | 4.8 ± 1.4 <sup>a)</sup> | 6.5 ± 1.5                       | 7.0 ± 1.7   |
| Percent GITR <sup>+</sup> cells among Tregs (mean ± SD)          | 3.8 ± 1.3 <sup>a)</sup> | 5.4 ± 2.0                       | 4.9 ± 2.1   |
| Percent PD-1 <sup>+</sup> cells among Tregs (mean ± SD)          | 7.6 ± 1.9 <sup>a)</sup> | 10.9 ± 1.9                      | 10.9 ± 2.7  |
| Percent Tim-3 <sup>+</sup> cells among Tregs (mean ± SD)         | 3.1 ± 1.4 <sup>a)</sup> | 6.1 ± 2.0                       | 5.6 ± 1.7   |
| Percent galectin-9 <sup>+</sup> cells among Tregs (mean ± SD)    | 4.4 ± 1.2 <sup>a)</sup> | 5.9 ± 1.6                       | 6.1 ± 1.6   |
| Percent TGF-beta <sup>+</sup> cells among Tregs (mean ± SD)      | 3.2 ± 1.0 <sup>a)</sup> | 5.6 ± 1.5                       | 5.1 ± 1.7   |

a) Significant differences between healthy controls and both the disease controls and HCC patients.

# Supplementary table 3:

## Genetic profile of P815 variants

| Marker Analysis |                      | Allele Size          |                                   |                                  |           |             |
|-----------------|----------------------|----------------------|-----------------------------------|----------------------------------|-----------|-------------|
| Locus           | Chromosomal Location | P815_Langhans et al. | P815_Almeida et al. <sup>a)</sup> | P815_Miller et al. <sup>b)</sup> | P815_ATCC | P815_DBA/2N |
| 18-3            | Chr 18               | 162/166              | 158                               | 164, 173                         | 156       | 151         |
| 4-2             | Chr 04               | 240                  | 240                               | 237                              | 237       | 237         |
| 6-7             | Chr 06               | 335/340              | 335                               | 331, 335                         | 335       | 335         |
| 9-2             | Chr 09               | 225/230              | N/A                               | 221, 233                         | 221, 225  | 221         |
| 15-3            | Chr 15               | 201/205              | 197/201                           | 197, 217                         | 193, 197  | 197         |
| 6-4             | Chr 06               | 297/301              | 297/201                           | 291, 303                         | 295, 299  | 299         |
| 12-1            | Chr 12               | 231                  | 235                               | 226, 230                         | 226, 229  | 225         |
| 5-5             | Chr 05               | 335/343              | 335                               | 330                              | 335       | 229         |
| x-1             | Chr X                | 401                  | 409                               | 422                              | 409       | 413         |

Authentication of murine mastocytoma cells is currently still difficult due to the lack of a standardized reference data base and there is considerable variation between P815 cells reported in different data bases. Thus, we could not find a perfect match to any of the reported data bases and the closest correspondance was to the recent report by Almeida and colleagues.

<sup>a)</sup> Almeida et al. Mouse cell line authentication. Cytotechnology 2014; 66: 133-147

<sup>b)</sup> Miller et al. Splenectomy promotes indirect elimination of intraocular tumors by CD8+ T cells that is associated with IFN $\gamma$ - and Fas/FasL-dependent activation. Cancer Immunol Res 2014; 1175-1185

# Supplementary figure 1

a)

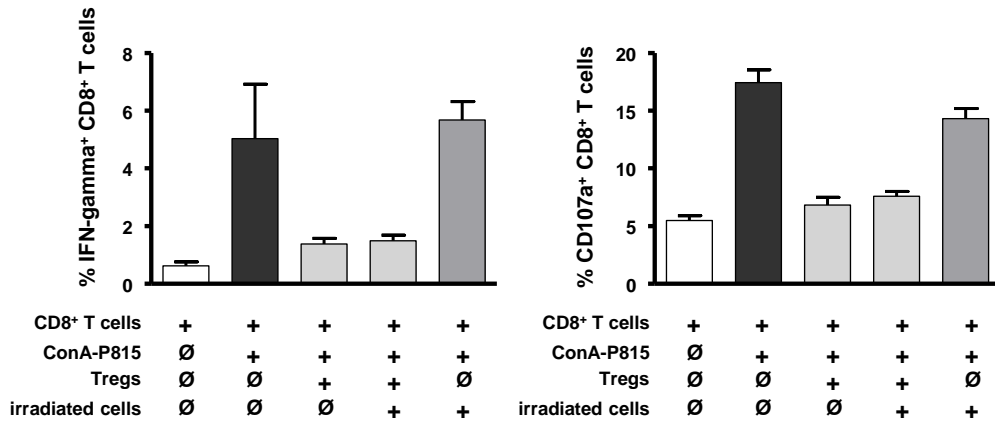

b)

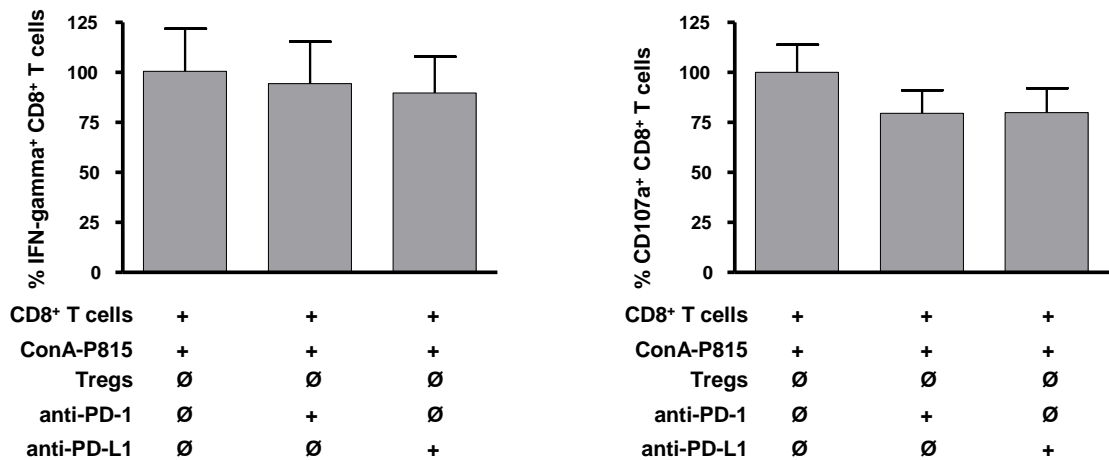

## Supplementary figure 1: Control experiments to demonstrate specificity of Treg mediated inhibition (a) and lack of direct inhibition of T effector cells by neutralizing PD-1 and PD-L1 antibodies (b) in the lectin-dependent cellular cytotoxicity (LDCC) assays

To exclude bias resulting from dilutional effects in the co-culture experiments we repeated the LDCC experiments in the presence of irradiated autologous PBMC (3,000 rad) shown in **figure a**. Experiments were performed with lymphocytes isolated from the blood of HCV-infected patients (n=3).

**Figure b** illustrates that control LDCC experiments with neutralizing anti-PD-1 and anti-PD-L1 in the absence of autologous Tregs did not reveal any effect on IFN-gamma production and T cell degranulation in patients with HCC.

# Supplementary figure 2

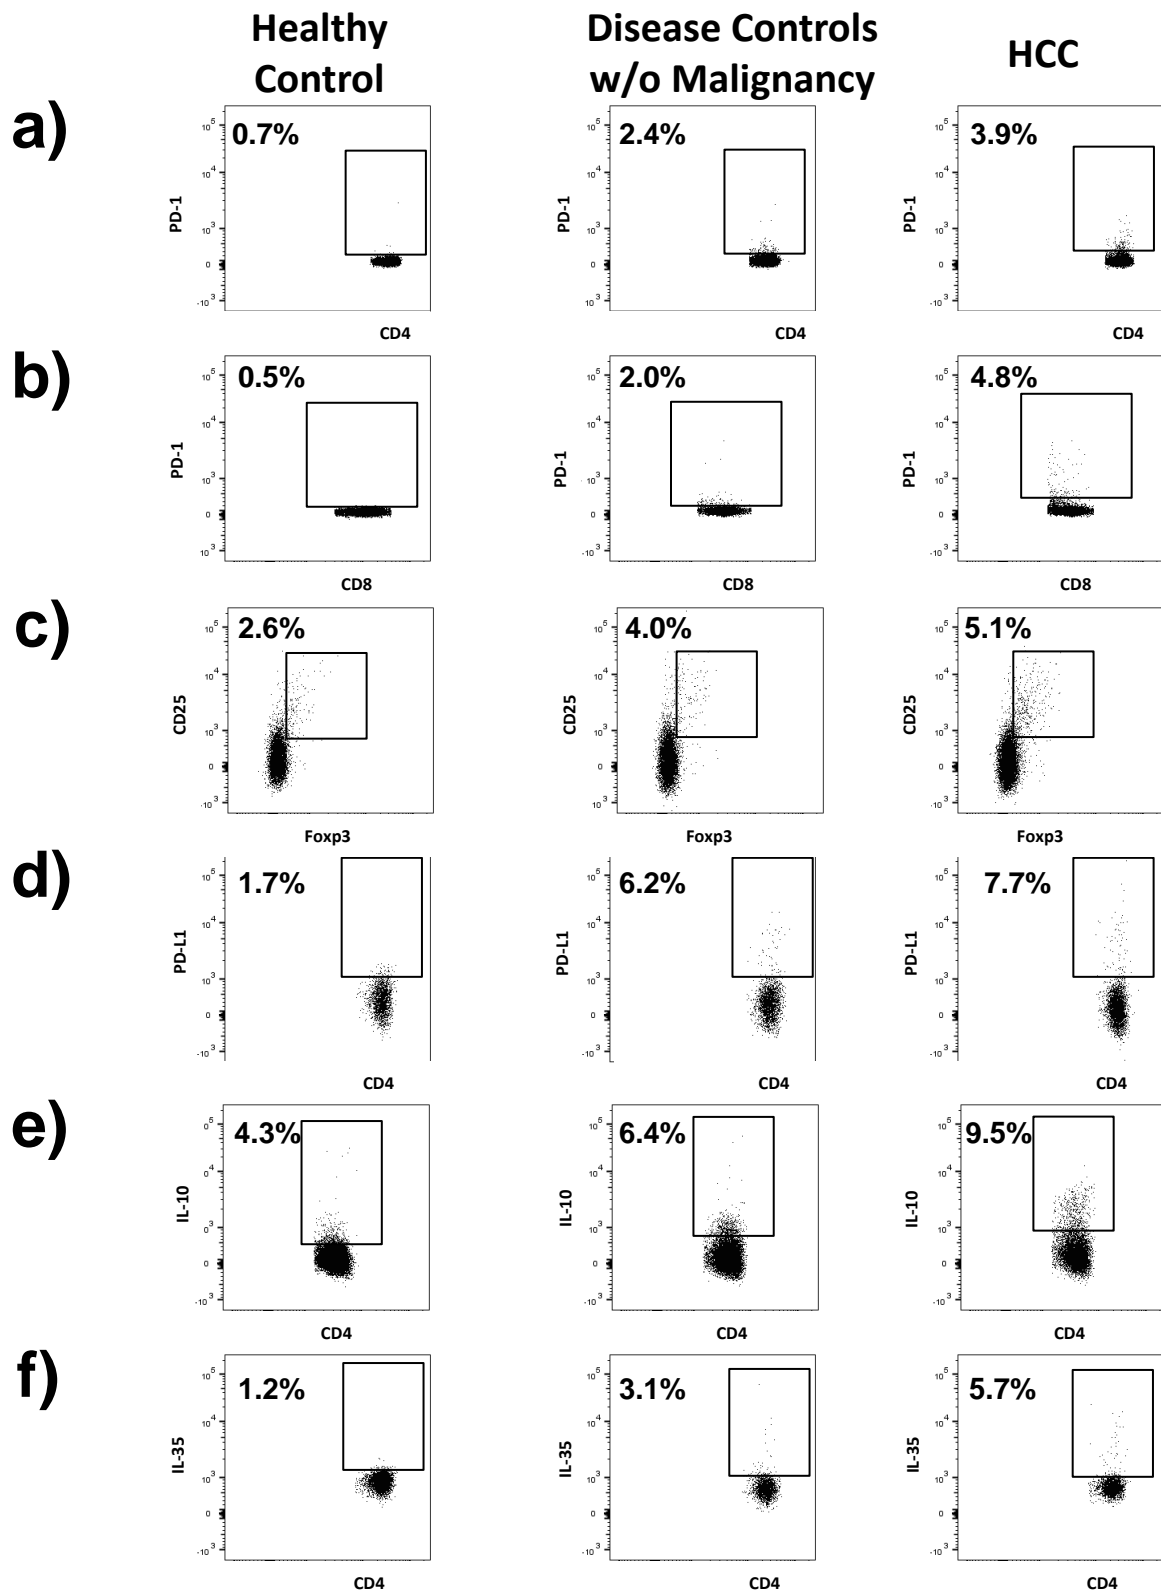

**Supplementary figure 2: Representative analysis of frequency/phenotype of T cell subsets**  
These figures show representative dot plots of PD-1<sup>+</sup> cells among CD4<sup>+</sup> (a) and CD8<sup>+</sup> T cells (b) in healthy controls (left), disease controls without HCC (middle) and patients with HCC (right). In addition, overall frequencies of CD4<sup>+</sup>CD25<sup>+</sup>Foxp3<sup>+</sup> Tregs (c) and frequencies of PD-L1<sup>+</sup> (d), IL-10<sup>+</sup> (e) and IL-35<sup>+</sup> cells among Tregs are illustrated (f).



# Supplementary figure 4

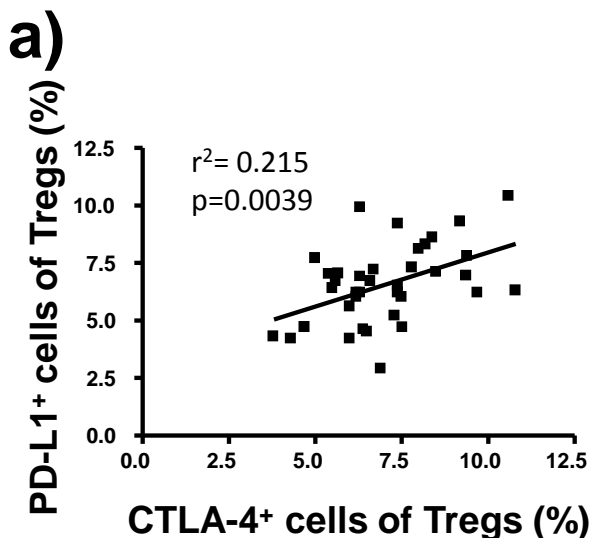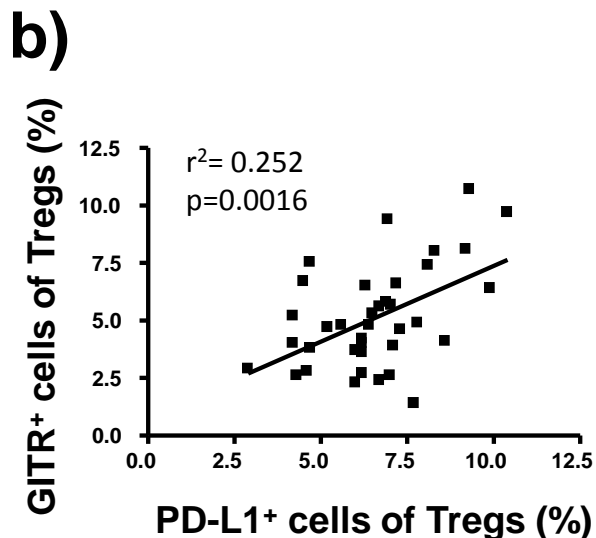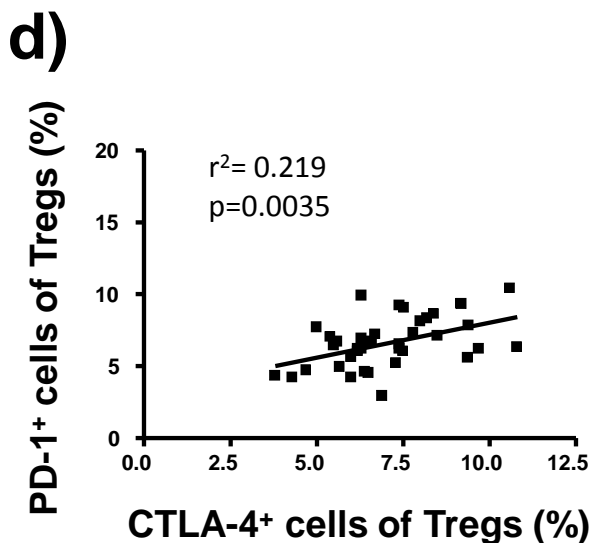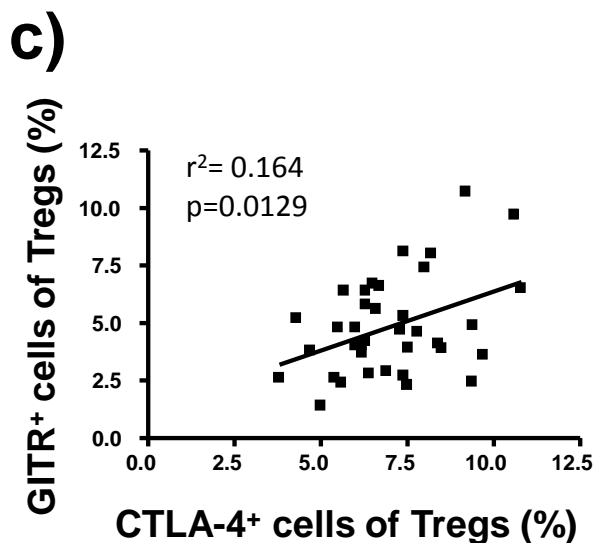

## Supplementary figure 4: Correlation of Treg subset markers to each other in patients with HCC

These figures demonstrate that frequencies of Tregs expressing CTLA-4, GITR, PD-1, and PD-L1 were significantly related to each other suggesting that these markers seem to stain closely related T cell subsets. Statistical parameters refer correlation coefficients and significances obtained by linear regression analysis.
